# Supplementary material for: Bilberry/red grape juice decreases plasma biomarkers of inflammation and tissue damage in aged men with subjective memory impairment –a randomized clinical trial
Source: PubMed Central journal article supplement (PMC8607697; doi:10.1186/s40795-021-00482-8), 2021-11-22
Supplement: 40795_2021_482_MOESM2_ESM.pdf [file 40795_2021_482_MOESM2_ESM.pdf]

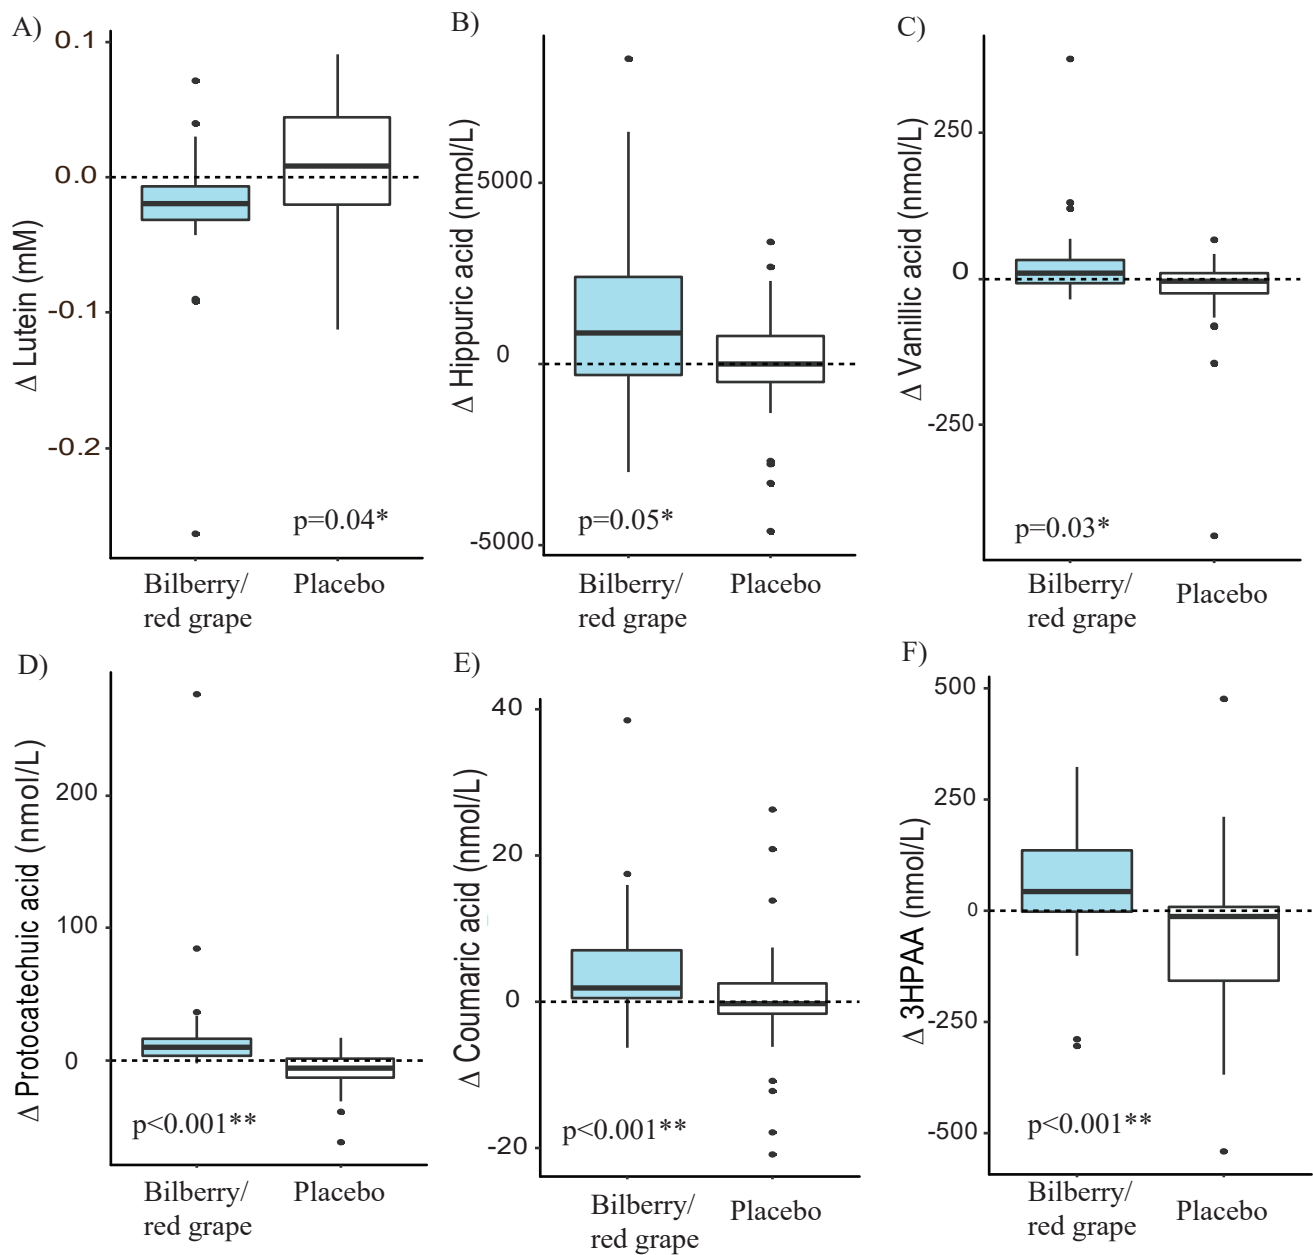

Change in lutein (A), and various polyphenols (B-F) in the bilberry/red grape juice group (blue boxes) compared to the placebo group (white boxes). P-values are obtained by non-parametric MW tests.
